# Supplementary material for: Sedative drugs misuse among Egyptian medical students, facts and alarms, A cross-sectional study
Source: Research Square preprint supplement (doi:10.21203/rs.3.rs-6632588/v1), 2025-10-16
Supplement: Supplementary file 1 [file 20577046522dc9c03c3e2f8e.pdf]

## Questionnaire: Prevalence of Sedative Use Among Medical Students in Egypt

\*By completing this questionnaire, you consent to participate in the study. Your identity will remain anonymous, and responses are used solely for research purposes.\*

### Demographic Data

1. Age: .....

2. Gender:

- ☐ Male
- ☐ Female

3. Academic Year:

- ☐ First
- ☐ Second
- ☐ Third
- ☐ Fourth
- ☐ Fifth
- ☐ Sixth
- ☐ Internship

4. Academic Grade Average:

- ☐ Excellent
- ☐ Very Good
- ☐ Good
- ☐ Pass
- ☐ Other: \_\_\_\_\_

5. Marital Status:

- ☐ Single
- ☐ Married

- ☐ Divorced
- ☐ Widowed
- ☐ Other: \_\_\_\_\_

6. Mother's Educational Level:

- ☐ Illiterate
- ☐ Secondary Education
- ☐ University Degree
- ☐ Postgraduate
- ☐ Other: \_\_\_\_\_

7. Father's Educational Level:

- ☐ Illiterate
- ☐ Secondary Education
- ☐ University Degree
- ☐ Postgraduate
- ☐ Other: \_\_\_\_\_

8. Monthly Family Income (in Egyptian pounds):

- ☐ 1,000 – 5,000
- ☐ 5,000 – 10,000
- ☐ 10,000 – 15,000
- ☐ 15,000 – 20,000
- ☐ More than 20,000

9. Number of family members (including yourself): .....

10. Living Arrangement:

- ☐ With family
- ☐ With friends
- ☐ Alone

- ☐ University dorms
- ☐ Other: \_\_\_\_\_

### Lifestyle & Habits

11. Do you smoke (cigarettes, shisha, vape, etc.)?

- ☐ Yes
- ☐ No
- ☐ Occasionally
- ☐ Ex-smoker

12. Do you regularly engage in physical activity (defined as at least 21 minutes, 3 times per week)?

- ☐ Yes
- ☐ No

13. Do you use any stimulants (e.g., coffee, tea, soft drinks, energy drinks)?

- ☐ Yes
- ☐ No

(a) Outside exam periods:

- ☐ Always
- ☐ Sometimes
- ☐ Rarely
- ☐ Never

(b) During exam periods:

- ☐ Always
- ☐ Sometimes
- ☐ Rarely
- ☐ Never

14. How many hours per week do you spend studying on average? .....

15. Average hours of sleep per day:

- ☐ Less than 4
- ☐ 4-6
- ☐ 6-8
- ☐ 8-10
- ☐ More than 10

16. How long does it usually take you to fall asleep? .....

17. What is your sleep pattern?

- ☐ Night only
- ☐ Day and night

18. How would you rate your sleep quality:

- ☐ Excellent: 6-8 hrs, uninterrupted, deep
- ☐ Good: 5-6 hrs, wakes up once or twice
- ☐ Poor: less than 5 hrs, light, fragmented

19. Do you experience any of the following sleep disorders:

- ☐ Insomnia (difficulty initiating or maintaining sleep)
- ☐ Sleep apnea (airway obstruction during sleep)
- ☐ Restless leg syndrome
- ☐ Narcolepsy (sudden uncontrollable sleep episodes)
- ☐ None
- ☐ Other: \_\_\_\_\_

### Sedative Use

20. Since joining medical school, have you ever used any sedative medications or sleep aids such as (zolan, Night Calm, antihistamines, etc.)?

- ☐ Yes
- ☐ No (If 'No,' you have completed the questionnaire.)

21. If yes, please specify the name of the medication: .....

22. How long have you used this medication?

- ☐ Occasionally
- ☐ Less than 1 year
- ☐ 1-2 years
- ☐ 2-3 years
- ☐ More than 3 years

23. When do you use this medication?

- ☐ Regularly
- ☐ Occasionally
- ☐ During exam periods
- ☐ At the beginning of the academic year

24. Was this medication prescribed by a doctor?

- ☐ Yes
- ☐ No

25. If yes, please state the reason for the prescription: .....

26. Do you feel dependent on this medication for sleep or emotional comfort?

- ☐ Yes, very much
- ☐ Yes, somewhat      ☐ No
